# Supplementary material for: The EGFR Signaling Modulates in Mesenchymal Stem Cells the Expression of miRNAs Involved in the Interaction with Breast Cancer Cells
Source: Cancers (Basel). 2022 Apr 6;14(7):1851. doi: 10.3390/cancers14071851 (PMC8997927; doi:10.3390/cancers14071851)
Supplement: Supplementary file 1 [file cancers-14-01851-s001.zip › Table S1- MiRNAs differentially expressed between untreated and TGFa┴-treated MSCs.xlsx]

## Sheet: Counts
miRNA	MSC_CTRL counts	MSC_TGFA counts
hsa-let-7a-2-3p	982.672	939.788
hsa-let-7a-3p	488.388	359.81
hsa-let-7a-5p	226978	153722
hsa-let-7b-3p	3304.73	2776.55
hsa-let-7b-5p	177984	135617
hsa-let-7c-3p	55.0296	68.2926
hsa-let-7c-5p	7877.1	4852.85
hsa-let-7d-3p	552.262	498.434
hsa-let-7d-5p	47889.5	37357.1
hsa-let-7e-3p	860.82	652.347
hsa-let-7e-5p	46816.4	44756.1
hsa-let-7f-1-3p	964.001	701.273
hsa-let-7f-2-3p	46.1856	62.1768
hsa-let-7f-5p	153603	106114
hsa-let-7g-3p	273.183	326.174
hsa-let-7g-5p	111410	83417.9
hsa-let-7i-3p	1227.36	2947.79
hsa-let-7i-5p	56609.8	65483.4
hsa-miR-100-3p	110.059	101.929
hsa-miR-100-5p	837854	822619
hsa-miR-101-3p	4554.68	5341.09
hsa-miR-101-5p	76.6484	62.1768
hsa-miR-103a-2-5p	263.356	344.521
hsa-miR-103a-3p	261120	285859
hsa-miR-105-5p	34.3935	51.9839
hsa-miR-106a-5p	51.0989	59.119
hsa-miR-106b-3p	1803.2	2259.77
hsa-miR-106b-5p	4540.93	3749.98
hsa-miR-107	25731.3	27557.6
hsa-miR-10a-3p	226.014	189.588
hsa-miR-10a-5p	65788.9	42710.4
hsa-miR-10b-3p	70.7524	57.0804
hsa-miR-10b-5p	29696.3	18788.6
hsa-miR-1178-3p	0.982672	3.05788
hsa-miR-1179	12.7747	7.13505
hsa-miR-1180-3p	99.2498	185.511
hsa-miR-1180-5p	22.6014	43.8296
hsa-miR-1185-1-3p	546.365	525.955
hsa-miR-1185-2-3p	154.279	150.855
hsa-miR-1185-5p	40.2895	23.4437
hsa-miR-1197	56.0123	27.5209
hsa-miR-1200	2.94802	1.01929
hsa-miR-122-3p	0.982672	3.05788
hsa-miR-1224-3p	0.982672	5.09646
hsa-miR-122-5p	2.94802	1.01929
hsa-miR-1226-3p	264.339	182.453
hsa-miR-1226-5p	0.982672	3.05788
hsa-miR-1227-3p	28.4975	41.791
hsa-miR-1228-3p	46.1856	95.8135
hsa-miR-1228-5p	21.6188	19.3666
hsa-miR-1229-3p	10.8094	6.11576
hsa-miR-1233-3p	1.96534	2.03859
hsa-miR-1234-3p	6.8787	5.09646
hsa-miR-1236-3p	2.94802	1.01929
hsa-miR-1237-3p	16.7054	29.5595
hsa-miR-1243	8.84405	3.05788
hsa-miR-1245a	3.93069	5.09646
hsa-miR-124-5p	2.94802	1.01929
hsa-miR-1246	65.839	53.0032
hsa-miR-1248	95.3192	153.913
hsa-miR-1249-3p	217.17	320.058
hsa-miR-1249-5p	4.91336	10.1929
hsa-miR-1254	16.7054	19.3666
hsa-miR-1255a	8.84405	9.17363
hsa-miR-1256	19.6534	23.4437
hsa-miR-125a-3p	293.819	328.212
hsa-miR-125a-5p	327514	277318
hsa-miR-125b-1-3p	567.984	954.058
hsa-miR-125b-2-3p	164.106	117.219
hsa-miR-125b-5p	1.62697e+06	1.39677e+06
hsa-miR-1260a	30352.8	72274
hsa-miR-1260b	20130	43356.6
hsa-miR-1262	4.91336	4.07717
hsa-miR-1263	0.982672	2.03859
hsa-miR-126-3p	471.682	627.884
hsa-miR-1265	2.94802	1.01929
hsa-miR-126-5p	125.782	71.3505
hsa-miR-1266-5p	4.91336	1.01929
hsa-miR-1267	29.4802	31.5981
hsa-miR-1268b	3.93069	8.15434
hsa-miR-1269a	0.982672	3.05788
hsa-miR-1270	104.163	111.103
hsa-miR-1271-3p	31.4455	37.7138
hsa-miR-1271-5p	666.251	978.521
hsa-miR-1272	1.96534	3.05788
hsa-miR-1273c	22.6014	29.5595
hsa-miR-1273d	0.982672	6.11576
hsa-miR-1273e	2.94802	1.01929
hsa-miR-1273g-3p	18.6708	25.4823
hsa-miR-1273h-5p	1.96534	2.03859
hsa-miR-127-3p	1177.24	1486.13
hsa-miR-1275	45.2029	79.5048
hsa-miR-127-5p	494.284	474.99
hsa-miR-1277-3p	2.94802	3.05788
hsa-miR-1277-5p	10.8094	17.328
hsa-miR-1278	15.7227	4.07717
hsa-miR-1281	1.96534	3.05788
hsa-miR-128-1-5p	10.8094	12.2315
hsa-miR-128-3p	1973.2	1858.17
hsa-miR-1284	7.86137	1.01929
hsa-miR-1285-3p	29.4802	51.9839
hsa-miR-1285-5p	28.4975	61.1576
hsa-miR-1287-3p	48.1509	55.0418
hsa-miR-1287-5p	113.007	84.6013
hsa-miR-1290	10.8094	14.2701
hsa-miR-1291	9.82672	2.03859
hsa-miR-129-1-3p	4.91336	3.05788
hsa-miR-1292-3p	0.982672	3.05788
hsa-miR-129-2-3p	258.443	368.984
hsa-miR-1292-5p	5.89603	20.3859
hsa-miR-1293	0.982672	2.03859
hsa-miR-1294	6.8787	6.11576
hsa-miR-1295b-3p	2.94802	5.09646
hsa-miR-129-5p	8.84405	11.2122
hsa-miR-1296-3p	12.7747	1.01929
hsa-miR-1296-5p	1139.9	901.055
hsa-miR-1297	0.982672	2.03859
hsa-miR-1299	14.7401	11.2122
hsa-miR-1301-3p	185.725	164.106
hsa-miR-1301-5p	0.982672	3.05788
hsa-miR-1303	8.84405	2.03859
hsa-miR-1304-3p	123.817	127.412
hsa-miR-1304-5p	34.3935	60.1383
hsa-miR-1305	0.982672	2.03859
hsa-miR-1306-3p	8.84405	13.2508
hsa-miR-1306-5p	480.526	644.193
hsa-miR-1307-3p	365.554	702.293
hsa-miR-1307-5p	82.5444	130.469
hsa-miR-130a-3p	47954.4	42793
hsa-miR-130b-3p	4554.68	4600.07
hsa-miR-130b-5p	4648.04	4092.46
hsa-miR-1322	3.93069	1.01929
hsa-miR-132-3p	3245.76	2642.01
hsa-miR-132-5p	1358.05	1801.09
hsa-miR-133a-3p	21.6188	13.2508
hsa-miR-133a-5p	4.91336	10.1929
hsa-miR-1343-3p	79.5964	83.582
hsa-miR-1343-5p	0.982672	8.15434
hsa-miR-134-3p	113.99	131.489
hsa-miR-134-5p	4613.64	4558.28
hsa-miR-135b-3p	0.982672	6.11576
hsa-miR-135b-5p	24.5668	27.5209
hsa-miR-136-3p	449.081	398.543
hsa-miR-136-5p	1365.91	1860.21
hsa-miR-137	1205.74	1350.56
hsa-miR-138-1-3p	2146.16	2549.25
hsa-miR-138-2-3p	6.8787	4.07717
hsa-miR-138-5p	26553.8	24820.8
hsa-miR-139-5p	45.2029	83.582
hsa-miR-1-3p	36.3589	56.0611
hsa-miR-140-3p	34386.6	42584
hsa-miR-140-5p	6961.25	7578.44
hsa-miR-141-3p	6.8787	12.2315
hsa-miR-141-5p	0.982672	9.17363
hsa-miR-142-3p	6.8787	11.2122
hsa-miR-142-5p	7.86137	13.2508
hsa-miR-143-3p	34240.2	32309.5
hsa-miR-143-5p	261.391	571.823
hsa-miR-144-5p	2.94802	4.07717
hsa-miR-145-3p	1798.29	1186.46
hsa-miR-145-5p	387056	333614
hsa-miR-1468-5p	5.89603	9.17363
hsa-miR-1469	2.94802	3.05788
hsa-miR-146a-5p	37.3415	26.5016
hsa-miR-146b-3p	12.7747	16.3087
hsa-miR-146b-5p	133.643	86.6399
hsa-miR-147b	7.86137	11.2122
hsa-miR-148a-3p	3880.57	4339.13
hsa-miR-148a-5p	4.91336	7.13505
hsa-miR-148b-3p	1114.35	1131.41
hsa-miR-148b-5p	20.6361	22.4244
hsa-miR-149-5p	2537.26	3444.19
hsa-miR-150-5p	18.6708	9.17363
hsa-miR-151a-3p	1712.8	1501.42
hsa-miR-151a-5p	26592.1	25773.8
hsa-miR-151b	36.3589	38.7331
hsa-miR-152-3p	10478.2	13319.1
hsa-miR-152-5p	372.433	417.91
hsa-miR-153-3p	0.982672	2.03859
hsa-miR-153-5p	2.94802	1.01929
hsa-miR-1537-3p	2.94802	1.01929
hsa-miR-1538	6.8787	5.09646
hsa-miR-154-3p	1277.47	933.672
hsa-miR-154-5p	772.38	636.039
hsa-miR-155-3p	36.3589	25.4823
hsa-miR-155-5p	2605.06	1480.01
hsa-miR-1587	1.96534	1.01929
hsa-miR-15a-3p	275.148	494.357
hsa-miR-15a-5p	9591.86	8310.29
hsa-miR-15b-3p	738.969	640.116
hsa-miR-15b-5p	64407.3	54157.1
hsa-miR-16-1-3p	0.982672	3.05788
hsa-miR-16-2-3p	1169.38	1075.35
hsa-miR-16-5p	62140.2	66269.3
hsa-miR-17-3p	1730.48	1852.05
hsa-miR-17-5p	13745.6	13359.9
hsa-miR-181a-2-3p	1121.23	864.36
hsa-miR-181a-3p	4484.91	3865.16
hsa-miR-181a-5p	7686.46	9890.2
hsa-miR-181b-2-3p	39.3069	103.968
hsa-miR-181b-3p	59.943	124.354
hsa-miR-181b-5p	5402.73	3471.71
hsa-miR-181c-3p	665.269	638.077
hsa-miR-181c-5p	568.967	447.469
hsa-miR-181d-3p	4.91336	2.03859
hsa-miR-181d-5p	350.814	161.048
hsa-miR-182-3p	0.982672	2.03859
hsa-miR-182-5p	30.4628	73.3891
hsa-miR-1827	44.2202	10.1929
hsa-miR-183-5p	16.7054	25.4823
hsa-miR-184	2.94802	4.07717
hsa-miR-185-3p	10.8094	18.3473
hsa-miR-185-5p	3529.76	3819.29
hsa-miR-186-3p	9.82672	6.11576
hsa-miR-186-5p	750.761	531.051
hsa-miR-187-3p	93.3538	81.5434
hsa-miR-187-5p	0.982672	5.09646
hsa-miR-188-3p	106.129	124.354
hsa-miR-188-5p	476.596	692.1
hsa-miR-18a-3p	130.695	134.547
hsa-miR-18a-5p	2513.67	2503.38
hsa-miR-18b-5p	48.1509	35.6752
hsa-miR-1908-5p	0.982672	13.2508
hsa-miR-1909-3p	0.982672	2.03859
hsa-miR-190a-3p	88.4405	34.6559
hsa-miR-190a-5p	168.037	67.2733
hsa-miR-190b	4.91336	6.11576
hsa-miR-1910-3p	1.96534	5.09646
hsa-miR-1913	1.96534	1.01929
hsa-miR-191-3p	52.0816	119.257
hsa-miR-1914-3p	2.94802	1.01929
hsa-miR-1914-5p	4.91336	3.05788
hsa-miR-1915-3p	2.94802	1.01929
hsa-miR-191-5p	56283.5	67665.7
hsa-miR-192-3p	32.4282	18.3473
hsa-miR-192-5p	1280.42	1364.83
hsa-miR-193a-3p	2201.18	2715.4
hsa-miR-193a-5p	3897.28	9804.58
hsa-miR-193b-3p	41640.7	42503.5
hsa-miR-193b-5p	489.371	626.865
hsa-miR-194-3p	6.8787	1.01929
hsa-miR-194-5p	96.3018	80.5241
hsa-miR-195-3p	130.695	69.3119
hsa-miR-195-5p	5686.72	5915.97
hsa-miR-196a-3p	20.6361	26.5016
hsa-miR-196a-5p	3743	2548.23
hsa-miR-196b-3p	44.2202	14.2701
hsa-miR-196b-5p	1169.38	899.016
hsa-miR-1972	1.96534	15.2894
hsa-miR-1973	21.6188	53.0032
hsa-miR-197-3p	5244.52	4836.54
hsa-miR-197-5p	5.89603	7.13505
hsa-miR-198	1.96534	1.01929
hsa-miR-199a-3p	58172.2	51051.3
hsa-miR-199a-5p	28018.9	38269.3
hsa-miR-199b-3p	125963	109879
hsa-miR-199b-5p	13864.5	12241.7
hsa-miR-19a-3p	4257.92	5656.05
hsa-miR-19a-5p	0.982672	9.17363
hsa-miR-19b-1-5p	106.129	60.1383
hsa-miR-19b-3p	11497.3	15060
hsa-miR-200a-3p	2.94802	5.09646
hsa-miR-200a-5p	6.8787	3.05788
hsa-miR-200b-3p	52.0816	20.3859
hsa-miR-200b-5p	4.91336	7.13505
hsa-miR-200c-3p	29.4802	41.791
hsa-miR-200c-5p	4.91336	5.09646
hsa-miR-203a-3p	113.99	147.797
hsa-miR-204-3p	1.96534	13.2508
hsa-miR-204-5p	701.628	602.402
hsa-miR-205-3p	1.96534	2.03859
hsa-miR-205-5p	83.5271	113.141
hsa-miR-20a-3p	150.349	223.225
hsa-miR-20a-5p	5678.86	4999.63
hsa-miR-20b-5p	10.8094	26.5016
hsa-miR-210-3p	7734.61	20877.2
hsa-miR-210-5p	295.784	401.601
hsa-miR-2110	57.9776	83.582
hsa-miR-2114-3p	30.4628	21.4051
hsa-miR-2114-5p	81.5618	54.0225
hsa-miR-2115-3p	0.982672	2.03859
hsa-miR-2116-3p	41.2722	49.9453
hsa-miR-2116-5p	31.4455	15.2894
hsa-miR-212-3p	163.124	107.026
hsa-miR-212-5p	48.1509	40.7717
hsa-miR-21-3p	2665.99	3789.73
hsa-miR-214-3p	80292.1	153860
hsa-miR-214-5p	9751.05	19927.2
hsa-miR-215-5p	51.0989	44.8489
hsa-miR-21-5p	1.53891e+06	1.31303e+06
hsa-miR-216a-3p	10.8094	3.05788
hsa-miR-216a-5p	8.84405	6.11576
hsa-miR-216b-5p	0.982672	7.13505
hsa-miR-217	6.8787	13.2508
hsa-miR-218-1-3p	2.94802	1.01929
hsa-miR-218-2-3p	2.94802	13.2508
hsa-miR-218-5p	5472.5	7381.72
hsa-miR-219a-1-3p	8.84405	7.13505
hsa-miR-219a-5p	2.94802	1.01929
hsa-miR-219b-5p	12.7747	11.2122
hsa-miR-221-3p	271452	260406
hsa-miR-221-5p	4036.82	2956.97
hsa-miR-222-3p	123944	137424
hsa-miR-222-5p	527.695	606.479
hsa-miR-223-3p	17.6881	5.09646
hsa-miR-22-3p	19538.5	28436.2
hsa-miR-224-3p	446.133	419.949
hsa-miR-224-5p	2048.87	1352.6
hsa-miR-22-5p	13045.9	9802.54
hsa-miR-2276-3p	0.982672	2.03859
hsa-miR-2276-5p	2.94802	7.13505
hsa-miR-2277-3p	27.5148	27.5209
hsa-miR-2277-5p	6.8787	16.3087
hsa-miR-2278	22.6014	13.2508
hsa-miR-2355-3p	211.274	208.955
hsa-miR-2355-5p	591.568	481.106
hsa-miR-23a-3p	720407	792857
hsa-miR-23a-5p	140.522	144.74
hsa-miR-23b-3p	385898	364452
hsa-miR-23b-5p	356.71	448.489
hsa-miR-23c	2071.47	1116.13
hsa-miR-24-1-5p	218.153	246.669
hsa-miR-24-2-5p	1012.15	1928.5
hsa-miR-24-3p	255486	251348
hsa-miR-2467-3p	11.7921	3.05788
hsa-miR-2467-5p	0.982672	5.09646
hsa-miR-25-3p	4217.63	6619.29
hsa-miR-25-5p	28.4975	17.328
hsa-miR-2681-5p	1.96534	2.03859
hsa-miR-2682-3p	175.898	312.923
hsa-miR-2682-5p	126.765	110.084
hsa-miR-26a-1-3p	54.0469	82.5627
hsa-miR-26a-2-3p	158.21	87.6592
hsa-miR-26a-5p	36664.5	23760.7
hsa-miR-26b-3p	364.571	330.251
hsa-miR-26b-5p	5183.59	3016.09
hsa-miR-27a-3p	104238	127899
hsa-miR-27a-5p	507.059	1249.65
hsa-miR-27b-3p	52225.1	61742.6
hsa-miR-27b-5p	1306.95	1283.29
hsa-miR-28-3p	3371.55	2589
hsa-miR-28-5p	1871.01	1598.25
hsa-miR-296-3p	173.933	161.048
hsa-miR-296-5p	919.781	909.209
hsa-miR-298	0.982672	2.03859
hsa-miR-299-3p	344.918	298.653
hsa-miR-299-5p	3083.62	2679.72
hsa-miR-29a-3p	731585	610191
hsa-miR-29a-5p	257.46	202.839
hsa-miR-29b-1-5p	3913.98	3875.35
hsa-miR-29b-2-5p	180.812	190.608
hsa-miR-29b-3p	28618.3	32798.8
hsa-miR-29c-3p	9738.28	9482.48
hsa-miR-29c-5p	564.054	406.698
hsa-miR-300	2.94802	1.01929
hsa-miR-301a-3p	2949.98	3535.93
hsa-miR-301a-5p	28.4975	37.7138
hsa-miR-301b-3p	203.413	174.299
hsa-miR-301b-5p	2.94802	1.01929
hsa-miR-302a-3p	4.91336	1.01929
hsa-miR-302b-3p	14.7401	3.05788
hsa-miR-302d-3p	10.8094	7.13505
hsa-miR-3064-3p	19.6534	15.2894
hsa-miR-3064-5p	1.96534	1.01929
hsa-miR-3065-3p	122.834	66.254
hsa-miR-3065-5p	35.3762	23.4437
hsa-miR-3074-3p	4.91336	3.05788
hsa-miR-3074-5p	1.96534	1.01929
hsa-miR-30a-3p	1290.25	1305.71
hsa-miR-30a-5p	14214.3	10087.9
hsa-miR-30b-3p	13.7574	42.8103
hsa-miR-30b-5p	8000.91	5113.79
hsa-miR-30c-1-3p	36.3589	30.5788
hsa-miR-30c-2-3p	133.643	109.064
hsa-miR-30c-5p	1374.76	1042.74
hsa-miR-30d-3p	3.93069	13.2508
hsa-miR-30d-5p	5043.07	3849.87
hsa-miR-30e-3p	920.763	726.756
hsa-miR-30e-5p	2931.31	2311.76
hsa-miR-3115	0.982672	3.05788
hsa-miR-3117-3p	32.4282	57.0804
hsa-miR-3117-5p	1.96534	1.01929
hsa-miR-3120-3p	2.94802	11.2122
hsa-miR-3120-5p	0.982672	3.05788
hsa-miR-3121-3p	0.982672	3.05788
hsa-miR-3124-3p	2.94802	5.09646
hsa-miR-3124-5p	0.982672	3.05788
hsa-miR-3126-3p	16.7054	26.5016
hsa-miR-3126-5p	4.91336	7.13505
hsa-miR-3127-3p	2.94802	1.01929
hsa-miR-3127-5p	2.94802	1.01929
hsa-miR-3129-3p	59.943	29.5595
hsa-miR-3129-5p	16.7054	6.11576
hsa-miR-3130-3p	0.982672	10.1929
hsa-miR-3130-5p	20.6361	31.5981
hsa-miR-3131	1.96534	1.01929
hsa-miR-3135b	565.036	797.087
hsa-miR-3136-5p	46.1856	24.463
hsa-miR-3137	1.96534	2.03859
hsa-miR-3138	21.6188	16.3087
hsa-miR-31-3p	7817.15	5514.37
hsa-miR-3140-3p	14.7401	5.09646
hsa-miR-3144-5p	2.94802	1.01929
hsa-miR-3145-3p	6.8787	4.07717
hsa-miR-3145-5p	10.8094	23.4437
hsa-miR-3146	2.94802	1.01929
hsa-miR-3150a-5p	8.84405	2.03859
hsa-miR-3151-3p	42.2549	33.6367
hsa-miR-3151-5p	2.94802	9.17363
hsa-miR-3152-3p	1.96534	1.01929
hsa-miR-3152-5p	15.7227	12.2315
hsa-miR-3154	4.91336	7.13505
hsa-miR-3156-3p	24.5668	16.3087
hsa-miR-3157-3p	0.982672	3.05788
hsa-miR-3157-5p	11.7921	21.4051
hsa-miR-3158-3p	10.8094	5.09646
hsa-miR-3158-5p	11.7921	8.15434
hsa-miR-31-5p	516477	685507
hsa-miR-3162-3p	0.982672	2.03859
hsa-miR-3163	2.94802	1.01929
hsa-miR-3164	0.982672	5.09646
hsa-miR-3165	6.8787	1.01929
hsa-miR-3167	3.93069	1.01929
hsa-miR-3170	0.982672	3.05788
hsa-miR-3173-3p	6.8787	1.01929
hsa-miR-3173-5p	1.96534	8.15434
hsa-miR-3174	0.982672	5.09646
hsa-miR-3175	0.982672	9.17363
hsa-miR-3176	11.7921	12.2315
hsa-miR-3177-3p	35.3762	17.328
hsa-miR-3177-5p	1.96534	5.09646
hsa-miR-3178	11.7921	25.4823
hsa-miR-3179	6.8787	7.13505
hsa-miR-3180-5p	8.84405	9.17363
hsa-miR-3182	28.4975	28.5402
hsa-miR-3184-3p	0.982672	2.03859
hsa-miR-3187-3p	3.93069	6.11576
hsa-miR-3187-5p	2.94802	1.01929
hsa-miR-3188	2.94802	3.05788
hsa-miR-3189-3p	0.982672	3.05788
hsa-miR-3190-3p	1.96534	1.01929
hsa-miR-3192-5p	0.982672	13.2508
hsa-miR-3194-3p	0.982672	3.05788
hsa-miR-3194-5p	13.7574	12.2315
hsa-miR-3195	6.8787	21.4051
hsa-miR-3196	4.91336	1.01929
hsa-miR-3198	0.982672	5.09646
hsa-miR-3199	1.96534	1.01929
hsa-miR-3200-3p	59.943	97.8521
hsa-miR-3200-5p	1.96534	3.05788
hsa-miR-3202	0.982672	2.03859
hsa-miR-320a	5019.49	5196.35
hsa-miR-320b	55.0296	59.119
hsa-miR-320c	27.5148	21.4051
hsa-miR-320d	14.7401	12.2315
hsa-miR-320e	1.96534	3.05788
hsa-miR-323a-3p	1568.34	1392.35
hsa-miR-323b-3p	1488.75	1682.85
hsa-miR-323b-5p	5.89603	1.01929
hsa-miR-32-3p	61.9083	57.0804
hsa-miR-324-3p	1061.29	1120.2
hsa-miR-324-5p	1162.5	1293.48
hsa-miR-325	1.96534	1.01929
hsa-miR-32-5p	156.245	220.167
hsa-miR-326	454.977	552.457
hsa-miR-328-3p	2465.52	2445.28
hsa-miR-328-5p	0.982672	3.05788
hsa-miR-329-3p	4679.48	3403.42
hsa-miR-329-5p	0.982672	4.07717
hsa-miR-330-3p	179.829	250.746
hsa-miR-330-5p	0.982672	3.05788
hsa-miR-331-3p	13144.2	14677.8
hsa-miR-331-5p	186.708	227.302
hsa-miR-335-3p	44.2202	32.6174
hsa-miR-335-5p	611.222	541.244
hsa-miR-337-3p	12993.9	10431.4
hsa-miR-337-5p	957.122	1392.35
hsa-miR-338-3p	6.8787	7.13505
hsa-miR-339-3p	716.368	946.923
hsa-miR-339-5p	6547.54	6899.59
hsa-miR-33a-3p	144.453	174.299
hsa-miR-33a-5p	20.6361	31.5981
hsa-miR-33b-3p	39.3069	89.6977
hsa-miR-33b-5p	6.8787	35.6752
hsa-miR-340-3p	169.02	277.248
hsa-miR-340-5p	83.5271	92.7556
hsa-miR-342-3p	1096.66	2360.68
hsa-miR-342-5p	22.6014	35.6752
hsa-miR-345-5p	1641.06	1804.15
hsa-miR-34a-3p	537.521	546.341
hsa-miR-34a-5p	28310.8	36813.8
hsa-miR-34b-3p	166.072	103.968
hsa-miR-34b-5p	337.056	336.367
hsa-miR-34c-3p	44.2202	42.8103
hsa-miR-34c-5p	939.434	1345.47
hsa-miR-3529-5p	2.94802	1.01929
hsa-miR-3591-5p	14.7401	9.17363
hsa-miR-3605-3p	87.4578	96.8328
hsa-miR-3605-5p	26.5321	12.2315
hsa-miR-3607-3p	3.93069	1.01929
hsa-miR-3607-5p	10.8094	10.1929
hsa-miR-3609	1.96534	3.05788
hsa-miR-3613-5p	6.8787	3.05788
hsa-miR-361-3p	2533.33	2766.36
hsa-miR-3614-5p	1.96534	1.01929
hsa-miR-3615	134.626	199.781
hsa-miR-361-5p	7944.9	4438
hsa-miR-3616-3p	32.4282	41.791
hsa-miR-3616-5p	3.93069	4.07717
hsa-miR-3617-3p	9.82672	1.01929
hsa-miR-3619-3p	14.7401	16.3087
hsa-miR-3619-5p	35.3762	38.7331
hsa-miR-3620-3p	54.0469	57.0804
hsa-miR-3620-5p	8.84405	3.05788
hsa-miR-3622a-3p	5.89603	5.09646
hsa-miR-3622a-5p	19.6534	39.7524
hsa-miR-362-3p	379.311	534.109
hsa-miR-362-5p	1546.73	770.585
hsa-miR-363-3p	1.96534	3.05788
hsa-miR-3646	0.982672	2.03859
hsa-miR-3648	2.94802	8.15434
hsa-miR-3651	10.8094	17.328
hsa-miR-3652	1.96534	1.01929
hsa-miR-3653-5p	2.94802	1.01929
hsa-miR-3656	1.96534	5.09646
hsa-miR-3657	1.96534	1.01929
hsa-miR-3659	2.94802	1.01929
hsa-miR-365a-3p	4169.48	2078.34
hsa-miR-365a-5p	31.4455	53.0032
hsa-miR-365b-3p	8979.65	4409.46
hsa-miR-365b-5p	34.3935	49.9453
hsa-miR-3660	0.982672	2.03859
hsa-miR-3661	8.84405	9.17363
hsa-miR-3664-3p	9.82672	2.03859
hsa-miR-3664-5p	0.982672	3.05788
hsa-miR-3677-5p	8.84405	3.05788
hsa-miR-3678-3p	2.94802	1.01929
hsa-miR-3679-3p	6.8787	8.15434
hsa-miR-3679-5p	58.9603	40.7717
hsa-miR-3682-5p	1.96534	3.05788
hsa-miR-3684	0.982672	2.03859
hsa-miR-3686	2.94802	1.01929
hsa-miR-3687	7.86137	8.15434
hsa-miR-3691-5p	3.93069	1.01929
hsa-miR-3692-3p	2.94802	3.05788
hsa-miR-369-3p	592.551	303.749
hsa-miR-369-5p	2162.86	1988.64
hsa-miR-370-3p	5482.33	5150.49
hsa-miR-370-5p	108.094	99.8907
hsa-miR-373-3p	8.84405	7.13505
hsa-miR-374a-3p	36.3589	25.4823
hsa-miR-374a-5p	715.385	414.852
hsa-miR-374b-3p	128.73	82.5627
hsa-miR-374b-5p	12106.5	6943.42
hsa-miR-374c-5p	188.673	134.547
hsa-miR-375	2.94802	9.17363
hsa-miR-376a-2-5p	52.0816	42.8103
hsa-miR-376a-3p	2345.64	2685.84
hsa-miR-376a-5p	432.376	283.363
hsa-miR-376b-3p	613.187	530.032
hsa-miR-376b-5p	743.882	464.797
hsa-miR-376c-3p	37448.6	35053.5
hsa-miR-376c-5p	48.1509	34.6559
hsa-miR-377-3p	153.297	134.547
hsa-miR-377-5p	948.278	644.193
hsa-miR-378a-3p	325.264	395.486
hsa-miR-378a-5p	83.5271	80.5241
hsa-miR-378b	0.982672	2.03859
hsa-miR-378c	28.4975	19.3666
hsa-miR-378d	2.94802	6.11576
hsa-miR-378e	5.89603	2.03859
hsa-miR-378f	2.94802	1.01929
hsa-miR-378h	2.94802	1.01929
hsa-miR-378i	2.94802	6.11576
hsa-miR-379-3p	670.182	313.942
hsa-miR-379-5p	5389.95	6847.61
hsa-miR-380-3p	789.085	443.392
hsa-miR-380-5p	6.8787	9.17363
hsa-miR-381-3p	1567.36	1328.14
hsa-miR-381-5p	216.188	113.141
hsa-miR-382-3p	1295.16	1131.41
hsa-miR-382-5p	4132.13	2816.31
hsa-miR-3907	1.96534	1.01929
hsa-miR-3909	189.656	149.836
hsa-miR-3910	0.982672	2.03859
hsa-miR-3911	2.94802	1.01929
hsa-miR-3912-3p	62.891	53.0032
hsa-miR-3912-5p	6.8787	3.05788
hsa-miR-3913-3p	13.7574	24.463
hsa-miR-3913-5p	8.84405	8.15434
hsa-miR-3920	1.96534	1.01929
hsa-miR-3921	1.96534	1.01929
hsa-miR-3927-3p	1.96534	1.01929
hsa-miR-3928-3p	44.2202	37.7138
hsa-miR-3928-5p	0.982672	3.05788
hsa-miR-3934-3p	11.7921	12.2315
hsa-miR-3934-5p	12.7747	3.05788
hsa-miR-3935	0.982672	3.05788
hsa-miR-3940-3p	150.349	147.797
hsa-miR-3942-3p	0.982672	3.05788
hsa-miR-3942-5p	2.94802	1.01929
hsa-miR-3943	2.94802	1.01929
hsa-miR-3944-3p	0.982672	11.2122
hsa-miR-3944-5p	0.982672	12.2315
hsa-miR-3960	2.94802	15.2894
hsa-miR-3973	1.96534	1.01929
hsa-miR-3974	13.7574	23.4437
hsa-miR-3975	1216.55	1233.34
hsa-miR-3976	4.91336	4.07717
hsa-miR-409-3p	14155.4	10671
hsa-miR-409-5p	461.856	417.91
hsa-miR-410-3p	303.646	119.257
hsa-miR-410-5p	5.89603	1.01929
hsa-miR-411-3p	1178.22	1083.51
hsa-miR-411-5p	444.168	511.685
hsa-miR-412-3p	31.4455	24.463
hsa-miR-412-5p	26.5321	109.064
hsa-miR-421	1756.03	1297.56
hsa-miR-423-3p	5179.66	6135.12
hsa-miR-423-5p	931.573	957.116
hsa-miR-424-3p	488.388	606.479
hsa-miR-424-5p	21924.4	21549.9
hsa-miR-4251	1.96534	7.13505
hsa-miR-425-3p	467.752	423.006
hsa-miR-4254	23.5841	17.328
hsa-miR-4255	21.6188	21.4051
hsa-miR-425-5p	7039.86	6030.13
hsa-miR-4256	197.517	190.608
hsa-miR-4257	1.96534	1.01929
hsa-miR-4258	170.002	314.961
hsa-miR-4259	0.982672	4.07717
hsa-miR-4261	1.96534	1.01929
hsa-miR-4262	3.93069	2.03859
hsa-miR-4263	2.94802	7.13505
hsa-miR-4265	16.7054	1.01929
hsa-miR-4266	0.982672	3.05788
hsa-miR-4268	2.94802	1.01929
hsa-miR-4269	2.94802	1.01929
hsa-miR-4270	21.6188	24.463
hsa-miR-4272	27.5148	56.0611
hsa-miR-4273	0.982672	2.03859
hsa-miR-4284	916.833	938.768
hsa-miR-4285	0.982672	2.03859
hsa-miR-4286	19636.7	27382.3
hsa-miR-429	0.982672	2.03859
hsa-miR-4291	2.94802	1.01929
hsa-miR-4292	5.89603	18.3473
hsa-miR-4294	1.96534	1.01929
hsa-miR-4295	53.0643	36.6945
hsa-miR-4296	0.982672	2.03859
hsa-miR-4298	6.8787	3.05788
hsa-miR-4300	33.4108	17.328
hsa-miR-4301	6716.56	6119.83
hsa-miR-4302	3.93069	9.17363
hsa-miR-4305	33.4108	18.3473
hsa-miR-4308	38.3242	25.4823
hsa-miR-4310	0.982672	3.05788
hsa-miR-431-3p	47.1682	51.9839
hsa-miR-4315	35.3762	27.5209
hsa-miR-431-5p	270.235	464.797
hsa-miR-4319	12.7747	15.2894
hsa-miR-4320	24.5668	15.2894
hsa-miR-4322	1.96534	1.01929
hsa-miR-432-3p	33.4108	33.6367
hsa-miR-4324	53.0643	65.2347
hsa-miR-4325	0.982672	2.03859
hsa-miR-432-5p	1745.22	807.28
hsa-miR-4326	63.8737	64.2154
hsa-miR-4328	1.96534	1.01929
hsa-miR-4329	9.82672	8.15434
hsa-miR-4330	2.94802	2.03859
hsa-miR-433-3p	490.353	392.428
hsa-miR-433-5p	24.5668	23.4437
hsa-miR-4417	0.982672	3.05788
hsa-miR-4419a	0.982672	2.03859
hsa-miR-4421	12.7747	15.2894
hsa-miR-4423-3p	58.9603	171.241
hsa-miR-4423-5p	59.943	120.277
hsa-miR-4429	3.93069	2.03859
hsa-miR-4433a-3p	14.7401	22.4244
hsa-miR-4433b-3p	0.982672	3.05788
hsa-miR-4435	2.94802	7.13505
hsa-miR-4436b-3p	2.94802	1.01929
hsa-miR-4436b-5p	1.96534	3.05788
hsa-miR-4438	0.982672	2.03859
hsa-miR-4440	10.8094	3.05788
hsa-miR-4443	1.96534	3.05788
hsa-miR-4448	48.1509	54.0225
hsa-miR-4449	2.94802	1.01929
hsa-miR-4453	2.94802	2.03859
hsa-miR-4454	533.591	942.846
hsa-miR-4455	1.96534	3.05788
hsa-miR-4458	0.982672	4.07717
hsa-miR-4459	3.93069	5.09646
hsa-miR-4461	11.7921	23.4437
hsa-miR-4463	0.982672	3.05788
hsa-miR-4466	27.5148	76.4469
hsa-miR-4467	1.96534	1.01929
hsa-miR-4470	4.91336	1.01929
hsa-miR-4473	8.84405	13.2508
hsa-miR-4474-3p	0.982672	3.05788
hsa-miR-4474-5p	1.96534	1.01929
hsa-miR-4476	2.94802	1.01929
hsa-miR-4478	5.89603	1.01929
hsa-miR-4479	3.93069	2.03859
hsa-miR-4480	0.982672	3.05788
hsa-miR-4482-5p	18.6708	15.2894
hsa-miR-4483	1.96534	2.03859
hsa-miR-4484	22.6014	21.4051
hsa-miR-4485-3p	133.643	327.193
hsa-miR-4485-5p	1.96534	2.03859
hsa-miR-4488	11.7921	23.4437
hsa-miR-4492	1.96534	2.03859
hsa-miR-4497	28.4975	80.5241
hsa-miR-449a	6.8787	43.8296
hsa-miR-449b-5p	3.93069	1.01929
hsa-miR-449c-5p	4.91336	10.1929
hsa-miR-4500	132.661	151.875
hsa-miR-4508	1.96534	3.05788
hsa-miR-450a-1-3p	10.8094	3.05788
hsa-miR-450a-2-3p	20.6361	29.5595
hsa-miR-450a-5p	185.725	119.257
hsa-miR-450b-5p	276.131	192.646
hsa-miR-4510	2.94802	1.01929
hsa-miR-4516	10.8094	22.4244
hsa-miR-451a	66.8217	13.2508
hsa-miR-4521	432.376	646.231
hsa-miR-452-3p	1.96534	1.01929
hsa-miR-4524a-3p	27.5148	15.2894
hsa-miR-4524a-5p	19.6534	22.4244
hsa-miR-4524b-3p	0.982672	2.03859
hsa-miR-4525	1.96534	1.01929
hsa-miR-452-5p	295.784	341.463
hsa-miR-4526	1.96534	3.05788
hsa-miR-4529-5p	0.982672	10.1929
hsa-miR-4530	0.982672	2.03859
hsa-miR-4532	115.955	278.267
hsa-miR-4536-5p	2.94802	1.01929
hsa-miR-454-3p	749.779	400.582
hsa-miR-454-5p	189.656	153.913
hsa-miR-455-3p	12728.5	12295.7
hsa-miR-455-5p	337.056	256.862
hsa-miR-4632-3p	7.86137	3.05788
hsa-miR-4636	19.6534	27.5209
hsa-miR-4637	2.94802	5.09646
hsa-miR-4638-3p	2.94802	9.17363
hsa-miR-4639-5p	0.982672	2.03859
hsa-miR-4640-3p	0.982672	5.09646
hsa-miR-4640-5p	3.93069	5.09646
hsa-miR-4644	6.8787	7.13505
hsa-miR-4645-5p	0.982672	4.07717
hsa-miR-4646-3p	2.94802	7.13505
hsa-miR-4647	0.982672	3.05788
hsa-miR-4649-3p	8.84405	10.1929
hsa-miR-4649-5p	4.91336	4.07717
hsa-miR-4650-3p	3.93069	1.01929
hsa-miR-4652-3p	0.982672	3.05788
hsa-miR-4653-3p	0.982672	3.05788
hsa-miR-4657	2.94802	2.03859
hsa-miR-4659b-5p	1.96534	1.01929
hsa-miR-466	13.7574	9.17363
hsa-miR-4660	0.982672	5.09646
hsa-miR-4661-5p	7.86137	7.13505
hsa-miR-4662a-3p	1.96534	1.01929
hsa-miR-4662a-5p	10.8094	11.2122
hsa-miR-4666a-3p	0.982672	7.13505
hsa-miR-4667-3p	8.84405	11.2122
hsa-miR-4667-5p	1.96534	1.01929
hsa-miR-4672	3.93069	1.01929
hsa-miR-4673	0.982672	3.05788
hsa-miR-4676-3p	12.7747	3.05788
hsa-miR-4676-5p	13.7574	21.4051
hsa-miR-4677-3p	23.5841	28.5402
hsa-miR-4677-5p	0.982672	3.05788
hsa-miR-4683	21.6188	13.2508
hsa-miR-4685-3p	12.7747	3.05788
hsa-miR-4687-3p	2.94802	3.05788
hsa-miR-4687-5p	16.7054	15.2894
hsa-miR-4688	0.982672	3.05788
hsa-miR-4689	0.982672	2.03859
hsa-miR-4690-3p	7.86137	19.3666
hsa-miR-4690-5p	0.982672	2.03859
hsa-miR-4691-3p	1.96534	3.05788
hsa-miR-4694-3p	4.91336	1.01929
hsa-miR-4694-5p	1.96534	1.01929
hsa-miR-4695-3p	4.91336	1.01929
hsa-miR-4701-5p	0.982672	3.05788
hsa-miR-4703-5p	1.96534	1.01929
hsa-miR-4704-5p	2.94802	2.03859
hsa-miR-4707-3p	98.2672	60.1383
hsa-miR-4707-5p	0.982672	5.09646
hsa-miR-4709-5p	4.91336	3.05788
hsa-miR-4711-5p	2.94802	1.01929
hsa-miR-4713-5p	0.982672	2.03859
hsa-miR-4714-3p	6.8787	12.2315
hsa-miR-4714-5p	8.84405	1.01929
hsa-miR-4715-3p	8.84405	19.3666
hsa-miR-4715-5p	6.8787	5.09646
hsa-miR-4716-3p	0.982672	3.05788
hsa-miR-4716-5p	2.94802	1.01929
hsa-miR-4717-3p	1.96534	3.05788
hsa-miR-4717-5p	0.982672	16.3087
hsa-miR-4720-5p	0.982672	3.05788
hsa-miR-4721	0.982672	4.07717
hsa-miR-4722-3p	0.982672	3.05788
hsa-miR-4722-5p	0.982672	4.07717
hsa-miR-4723-3p	1.96534	12.2315
hsa-miR-4723-5p	0.982672	3.05788
hsa-miR-4725-3p	2.94802	3.05788
hsa-miR-4725-5p	8.84405	14.2701
hsa-miR-4726-3p	0.982672	5.09646
hsa-miR-4726-5p	0.982672	5.09646
hsa-miR-4728-3p	28.4975	37.7138
hsa-miR-4728-5p	3.93069	1.01929
hsa-miR-4729	6.8787	3.05788
hsa-miR-4730	2.94802	3.05788
hsa-miR-4731-3p	14.7401	37.7138
hsa-miR-4731-5p	4.91336	7.13505
hsa-miR-4732-5p	2.94802	1.01929
hsa-miR-4733-5p	2.94802	1.01929
hsa-miR-4735-5p	0.982672	3.05788
hsa-miR-4738-3p	0.982672	2.03859
hsa-miR-4739	3.93069	2.03859
hsa-miR-4740-3p	2.94802	1.01929
hsa-miR-4741	3.93069	1.01929
hsa-miR-4742-3p	4.91336	5.09646
hsa-miR-4742-5p	5.89603	10.1929
hsa-miR-4743-5p	0.982672	7.13505
hsa-miR-4745-3p	5.89603	6.11576
hsa-miR-4746-5p	10.8094	9.17363
hsa-miR-4747-5p	4.91336	1.01929
hsa-miR-4748	0.982672	5.09646
hsa-miR-4749-3p	0.982672	8.15434
hsa-miR-4750-3p	0.982672	4.07717
hsa-miR-4755-5p	0.982672	2.03859
hsa-miR-4756-5p	1.96534	1.01929
hsa-miR-4757-5p	2.94802	7.13505
hsa-miR-4760-5p	1.96534	1.01929
hsa-miR-4761-3p	0.982672	7.13505
hsa-miR-4761-5p	0.982672	4.07717
hsa-miR-4762-5p	6.8787	2.03859
hsa-miR-4766-3p	2.94802	1.01929
hsa-miR-4766-5p	0.982672	3.05788
hsa-miR-4767	3.93069	14.2701
hsa-miR-4768-3p	3.93069	12.2315
hsa-miR-4768-5p	1.96534	1.01929
hsa-miR-4769-3p	4.91336	4.07717
hsa-miR-4769-5p	0.982672	3.05788
hsa-miR-4774-3p	0.982672	2.03859
hsa-miR-4775	2.94802	1.01929
hsa-miR-4781-3p	3.93069	1.01929
hsa-miR-4782-3p	2.94802	1.01929
hsa-miR-4782-5p	1.96534	1.01929
hsa-miR-4783-3p	0.982672	11.2122
hsa-miR-4785	24.5668	36.6945
hsa-miR-4787-3p	29.4802	40.7717
hsa-miR-4788	10.8094	2.03859
hsa-miR-4789-3p	4.91336	5.09646
hsa-miR-4789-5p	0.982672	3.05788
hsa-miR-4791	6.8787	6.11576
hsa-miR-4792	110.059	141.682
hsa-miR-4794	3.93069	2.03859
hsa-miR-4795-5p	4.91336	1.01929
hsa-miR-4797-3p	0.982672	2.03859
hsa-miR-4797-5p	2.94802	4.07717
hsa-miR-4798-5p	0.982672	5.09646
hsa-miR-4799-5p	11.7921	5.09646
hsa-miR-4800-3p	1.96534	1.01929
hsa-miR-4802-3p	0.982672	3.05788
hsa-miR-4803	0.982672	5.09646
hsa-miR-4804-3p	8.84405	7.13505
hsa-miR-4804-5p	7.86137	1.01929
hsa-miR-483-3p	499.197	509.646
hsa-miR-483-5p	45.2029	55.0418
hsa-miR-484	19019.6	20415.4
hsa-miR-485-3p	1378.69	1991.7
hsa-miR-485-5p	1217.53	1545.25
hsa-miR-486-5p	19.6534	35.6752
hsa-miR-487a-3p	1006.26	715.543
hsa-miR-487a-5p	126.765	111.103
hsa-miR-487b-3p	10263	7027
hsa-miR-487b-5p	23.5841	12.2315
hsa-miR-489-3p	0.982672	4.07717
hsa-miR-490-3p	0.982672	7.13505
hsa-miR-491-3p	41.2722	15.2894
hsa-miR-491-5p	78.6137	74.4084
hsa-miR-492	1.96534	1.01929
hsa-miR-493-3p	1388.52	973.424
hsa-miR-493-5p	11885.4	10553.8
hsa-miR-494-3p	2179.57	2227.15
hsa-miR-494-5p	16.7054	12.2315
hsa-miR-495-3p	3911.03	4194.39
hsa-miR-495-5p	38.3242	35.6752
hsa-miR-496	535.556	329.232
hsa-miR-497-3p	42.2549	51.9839
hsa-miR-497-5p	674.113	643.174
hsa-miR-4999-3p	3.93069	2.03859
hsa-miR-4999-5p	1.96534	1.01929
hsa-miR-499a-5p	0.982672	2.03859
hsa-miR-499b-5p	6.8787	6.11576
hsa-miR-5000-3p	2.94802	1.01929
hsa-miR-5000-5p	5.89603	3.05788
hsa-miR-5001-3p	16.7054	10.1929
hsa-miR-5001-5p	0.982672	5.09646
hsa-miR-5003-5p	0.982672	11.2122
hsa-miR-5004-3p	0.982672	7.13505
hsa-miR-5006-3p	4.91336	1.01929
hsa-miR-5008-3p	0.982672	3.05788
hsa-miR-5008-5p	5.89603	16.3087
hsa-miR-5009-3p	4.91336	3.05788
hsa-miR-5009-5p	0.982672	3.05788
hsa-miR-500a-3p	594.516	611.576
hsa-miR-500a-5p	226.997	174.299
hsa-miR-500b-5p	112.025	54.0225
hsa-miR-5010-3p	15.7227	19.3666
hsa-miR-5010-5p	8.84405	6.11576
hsa-miR-5011-3p	1.96534	1.01929
hsa-miR-501-3p	128.73	161.048
hsa-miR-501-5p	212.257	124.354
hsa-miR-502-3p	1780.6	1749.11
hsa-miR-502-5p	114.973	82.5627
hsa-miR-503-3p	11.7921	10.1929
hsa-miR-503-5p	749.779	754.277
hsa-miR-504-5p	9.82672	1.01929
hsa-miR-505-3p	5012.61	4660.21
hsa-miR-505-5p	689.836	457.662
hsa-miR-507	0.982672	2.03859
hsa-miR-5088-3p	1.96534	2.03859
hsa-miR-5088-5p	1.96534	1.01929
hsa-miR-5090	0.982672	3.05788
hsa-miR-5093	0.982672	3.05788
hsa-miR-5094	0.982672	3.05788
hsa-miR-5096	4.91336	8.15434
hsa-miR-5100	350.814	406.698
hsa-miR-512-3p	10.8094	1.01929
hsa-miR-512-5p	11.7921	1.01929
hsa-miR-513b-5p	0.982672	3.05788
hsa-miR-515-3p	2.94802	1.01929
hsa-miR-517a-3p	73.7004	1.01929
hsa-miR-517b-3p	109.077	1.01929
hsa-miR-517c-3p	16.7054	1.01929
hsa-miR-5187-3p	2.94802	1.01929
hsa-miR-5188	0.982672	2.03859
hsa-miR-5189-3p	2.94802	3.05788
hsa-miR-5189-5p	0.982672	3.05788
hsa-miR-518a-5p	1.96534	1.01929
hsa-miR-518b	6.8787	1.01929
hsa-miR-518c-5p	1.96534	1.01929
hsa-miR-518e-3p	6.8787	1.01929
hsa-miR-5190	1.96534	1.01929
hsa-miR-5193	4.91336	9.17363
hsa-miR-519a-3p	12.7747	3.05788
hsa-miR-519d-3p	11.7921	1.01929
hsa-miR-519e-5p	1.96534	1.01929
hsa-miR-520c-5p	1.96534	1.01929
hsa-miR-520d-5p	2.94802	1.01929
hsa-miR-520g-3p	12.7747	1.01929
hsa-miR-520h	11.7921	1.01929
hsa-miR-521	8.84405	1.01929
hsa-miR-522-3p	2.94802	1.01929
hsa-miR-524-5p	4.91336	1.01929
hsa-miR-525-5p	1.96534	1.01929
hsa-miR-526a	2.94802	1.01929
hsa-miR-527	1.96534	1.01929
hsa-miR-532-3p	1260.77	2550.27
hsa-miR-532-5p	7844.67	10379.5
hsa-miR-539-3p	28.4975	22.4244
hsa-miR-539-5p	849.028	530.032
hsa-miR-541-3p	2.94802	7.13505
hsa-miR-541-5p	0.982672	3.05788
hsa-miR-542-3p	872.612	1570.73
hsa-miR-542-5p	232.893	241.572
hsa-miR-543	1572.27	1226.21
hsa-miR-544a	0.982672	2.03859
hsa-miR-545-3p	39.3069	47.9068
hsa-miR-545-5p	128.73	73.3891
hsa-miR-548a-5p	0.982672	3.05788
hsa-miR-548aa	96.3018	88.6785
hsa-miR-548ac	0.982672	3.05788
hsa-miR-548ae-5p	2.94802	1.01929
hsa-miR-548ah-3p	0.982672	2.03859
hsa-miR-548ai	12.7747	4.07717
hsa-miR-548aj-5p	0.982672	3.05788
hsa-miR-548al	15.7227	21.4051
hsa-miR-548aq-3p	8.84405	2.03859
hsa-miR-548aq-5p	2.94802	1.01929
hsa-miR-548aw	5.89603	12.2315
hsa-miR-548ay-3p	0.982672	3.05788
hsa-miR-548c-3p	0.982672	2.03859
hsa-miR-548d-3p	0.982672	3.05788
hsa-miR-548d-5p	2.94802	1.01929
hsa-miR-548e-3p	3.93069	5.09646
hsa-miR-548f-5p	1.96534	15.2894
hsa-miR-548g-5p	0.982672	2.03859
hsa-miR-548h-3p	0.982672	8.15434
hsa-miR-548h-5p	0.982672	2.03859
hsa-miR-548j-5p	2.94802	2.03859
hsa-miR-548l	2.94802	1.01929
hsa-miR-548m	0.982672	3.05788
hsa-miR-548n	1.96534	1.01929
hsa-miR-548o-3p	15.7227	5.09646
hsa-miR-548o-5p	1.96534	2.03859
hsa-miR-548p	4.91336	1.01929
hsa-miR-548q	12.7747	29.5595
hsa-miR-548s	4.91336	3.05788
hsa-miR-548t-3p	128.73	146.778
hsa-miR-548v	0.982672	5.09646
hsa-miR-548w	3.93069	1.01929
hsa-miR-548z	10.8094	1.01929
hsa-miR-549a	214.222	170.222
hsa-miR-550a-3-5p	12.7747	6.11576
hsa-miR-550a-3p	24.5668	41.791
hsa-miR-550a-5p	62.891	62.1768
hsa-miR-550b-3p	1.96534	1.01929
hsa-miR-551a	52.0816	25.4823
hsa-miR-551b-3p	400.93	602.402
hsa-miR-556-3p	0.982672	3.05788
hsa-miR-5579-5p	14.7401	5.09646
hsa-miR-5580-3p	2.94802	5.09646
hsa-miR-5581-3p	14.7401	27.5209
hsa-miR-5581-5p	2.94802	7.13505
hsa-miR-5582-3p	0.982672	3.05788
hsa-miR-5585-3p	4.91336	23.4437
hsa-miR-5587-3p	2.94802	3.05788
hsa-miR-5587-5p	5.89603	5.09646
hsa-miR-5588-5p	0.982672	5.09646
hsa-miR-5591-3p	0.982672	3.05788
hsa-miR-561-3p	8.84405	7.13505
hsa-miR-561-5p	0.982672	3.05788
hsa-miR-566	1.96534	2.03859
hsa-miR-5681b	4.91336	1.01929
hsa-miR-5684	2.94802	1.01929
hsa-miR-5690	9.82672	18.3473
hsa-miR-5693	55.0296	38.7331
hsa-miR-5695	2.94802	3.05788
hsa-miR-5696	2.94802	1.01929
hsa-miR-5699-3p	6.8787	5.09646
hsa-miR-5699-5p	42.2549	54.0225
hsa-miR-5701	0.982672	3.05788
hsa-miR-5702	1.96534	1.01929
hsa-miR-570-3p	5.89603	3.05788
hsa-miR-5704	1.96534	1.01929
hsa-miR-570-5p	8.84405	1.01929
hsa-miR-5707	0.982672	2.03859
hsa-miR-573	0.982672	4.07717
hsa-miR-574-3p	27854.8	82386.4
hsa-miR-574-5p	1296.14	2447.32
hsa-miR-576-3p	4.91336	1.01929
hsa-miR-576-5p	56.995	18.3473
hsa-miR-5787	1.96534	2.03859
hsa-miR-579-3p	40.2895	23.4437
hsa-miR-579-5p	13.7574	10.1929
hsa-miR-580-3p	6.8787	3.05788
hsa-miR-581	1.96534	1.01929
hsa-miR-582-3p	1.96534	1.01929
hsa-miR-582-5p	105.146	68.2926
hsa-miR-584-3p	8.84405	11.2122
hsa-miR-584-5p	194.569	113.141
hsa-miR-585-3p	27.5148	43.8296
hsa-miR-585-5p	25.5495	89.6977
hsa-miR-586	0.982672	3.05788
hsa-miR-588	0.982672	3.05788
hsa-miR-589-3p	50.1163	109.064
hsa-miR-589-5p	36.3589	54.0225
hsa-miR-590-3p	241.737	97.8521
hsa-miR-590-5p	1545.74	2091.59
hsa-miR-592	0.982672	3.05788
hsa-miR-596	1.96534	2.03859
hsa-miR-597-3p	2.94802	4.07717
hsa-miR-597-5p	2.94802	3.05788
hsa-miR-598-3p	170.002	280.305
hsa-miR-602	0.982672	3.05788
hsa-miR-605-3p	3.93069	19.3666
hsa-miR-605-5p	18.6708	19.3666
hsa-miR-6068	1.96534	3.05788
hsa-miR-6069	2.94802	11.2122
hsa-miR-6074	1.96534	3.05788
hsa-miR-6075	4.91336	1.01929
hsa-miR-6079	3.93069	1.01929
hsa-miR-6085	11.7921	27.5209
hsa-miR-6087	8.84405	21.4051
hsa-miR-6088	1.96534	1.01929
hsa-miR-6089	4.91336	1.01929
hsa-miR-6090	0.982672	2.03859
hsa-miR-610	11.7921	4.07717
hsa-miR-6131	2.94802	2.03859
hsa-miR-6133	1.96534	1.01929
hsa-miR-6134	3.93069	3.05788
hsa-miR-614	4.91336	3.05788
hsa-miR-615-3p	661.338	730.833
hsa-miR-615-5p	28.4975	84.6013
hsa-miR-616-3p	12.7747	19.3666
hsa-miR-616-5p	121.851	111.103
hsa-miR-617	0.982672	3.05788
hsa-miR-618	71.735	31.5981
hsa-miR-619-5p	58.9603	64.2154
hsa-miR-624-3p	3.93069	6.11576
hsa-miR-624-5p	82.5444	45.8682
hsa-miR-625-3p	1248.98	1188.5
hsa-miR-625-5p	100.233	149.836
hsa-miR-627-3p	1.96534	1.01929
hsa-miR-627-5p	29.4802	81.5434
hsa-miR-628-3p	104.163	68.2926
hsa-miR-628-5p	1028.86	1034.58
hsa-miR-629-3p	65.839	69.3119
hsa-miR-629-5p	289.888	266.035
hsa-miR-632	0.982672	2.03859
hsa-miR-636	6.8787	7.13505
hsa-miR-638	0.982672	2.03859
hsa-miR-641	22.6014	27.5209
hsa-miR-642a-3p	5.89603	16.3087
hsa-miR-642a-5p	35.3762	17.328
hsa-miR-642b-3p	2.94802	3.05788
hsa-miR-642b-5p	2.94802	1.01929
hsa-miR-643	11.7921	14.2701
hsa-miR-647	0.982672	3.05788
hsa-miR-6500-3p	28.4975	28.5402
hsa-miR-6501-5p	4.91336	19.3666
hsa-miR-6502-5p	2.94802	1.01929
hsa-miR-6504-5p	1.96534	5.09646
hsa-miR-6509-5p	2.94802	4.07717
hsa-miR-6510-5p	2.94802	1.01929
hsa-miR-6511a-3p	56.0123	72.3698
hsa-miR-6511a-5p	3.93069	5.09646
hsa-miR-6511b-3p	103.181	142.701
hsa-miR-6511b-5p	6.8787	5.09646
hsa-miR-6512-3p	0.982672	3.05788
hsa-miR-6513-3p	14.7401	5.09646
hsa-miR-6513-5p	6.8787	12.2315
hsa-miR-651-3p	0.982672	3.05788
hsa-miR-6514-3p	2.94802	5.09646
hsa-miR-6514-5p	2.94802	3.05788
hsa-miR-6515-3p	3.93069	17.328
hsa-miR-6515-5p	2.94802	1.01929
hsa-miR-651-5p	2.94802	1.01929
hsa-miR-6516-3p	3.93069	4.07717
hsa-miR-6516-5p	0.982672	7.13505
hsa-miR-652-3p	937.469	595.267
hsa-miR-652-5p	504.111	527.994
hsa-miR-654-3p	21958.8	17629.7
hsa-miR-654-5p	135.609	111.103
hsa-miR-655-3p	483.474	325.154
hsa-miR-655-5p	75.6657	70.3312
hsa-miR-656-3p	656.425	309.865
hsa-miR-656-5p	26.5321	39.7524
hsa-miR-657	0.982672	3.05788
hsa-miR-659-3p	1.96534	1.01929
hsa-miR-659-5p	1.96534	12.2315
hsa-miR-660-3p	279.079	307.826
hsa-miR-660-5p	3157.32	2288.31
hsa-miR-663a	2.94802	5.09646
hsa-miR-663b	2.94802	11.2122
hsa-miR-664a-3p	3244.78	1759.3
hsa-miR-664a-5p	171.968	146.778
hsa-miR-664b-3p	162.141	94.7942
hsa-miR-664b-5p	4.91336	5.09646
hsa-miR-665	643.65	825.627
hsa-miR-668-3p	88.4405	90.717
hsa-miR-671-3p	429.428	559.592
hsa-miR-671-5p	2062.63	2359.66
hsa-miR-6716-3p	8.84405	5.09646
hsa-miR-6720-3p	29.4802	44.8489
hsa-miR-6720-5p	39.3069	36.6945
hsa-miR-6721-5p	4.91336	13.2508
hsa-miR-6723-5p	30.4628	14.2701
hsa-miR-6724-5p	3.93069	7.13505
hsa-miR-6726-3p	6.8787	7.13505
hsa-miR-6727-3p	2.94802	6.11576
hsa-miR-6727-5p	1.96534	1.01929
hsa-miR-6729-3p	2.94802	4.07717
hsa-miR-6730-3p	0.982672	3.05788
hsa-miR-6731-3p	4.91336	3.05788
hsa-miR-6732-3p	0.982672	3.05788
hsa-miR-6733-3p	1.96534	1.01929
hsa-miR-6734-3p	16.7054	21.4051
hsa-miR-6734-5p	0.982672	5.09646
hsa-miR-6735-3p	3.93069	6.11576
hsa-miR-6735-5p	2.94802	1.01929
hsa-miR-6736-3p	1.96534	17.328
hsa-miR-6737-3p	8.84405	7.13505
hsa-miR-6740-3p	2.94802	3.05788
hsa-miR-6741-3p	8.84405	7.13505
hsa-miR-6741-5p	0.982672	2.03859
hsa-miR-6742-3p	0.982672	6.11576
hsa-miR-6743-3p	4.91336	7.13505
hsa-miR-6743-5p	1.96534	1.01929
hsa-miR-6746-3p	0.982672	13.2508
hsa-miR-6746-5p	4.91336	4.07717
hsa-miR-6747-3p	32.4282	20.3859
hsa-miR-6749-3p	4.91336	11.2122
hsa-miR-6752-3p	4.91336	1.01929
hsa-miR-6752-5p	2.94802	1.01929
hsa-miR-6753-3p	0.982672	2.03859
hsa-miR-675-3p	8.84405	6.11576
hsa-miR-6754-5p	0.982672	3.05788
hsa-miR-675-5p	6.8787	19.3666
hsa-miR-6756-3p	16.7054	7.13505
hsa-miR-6757-3p	11.7921	12.2315
hsa-miR-6757-5p	8.84405	4.07717
hsa-miR-6758-3p	4.91336	9.17363
hsa-miR-6762-3p	4.91336	1.01929
hsa-miR-6762-5p	1.96534	3.05788
hsa-miR-6763-5p	1.96534	1.01929
hsa-miR-6764-5p	0.982672	5.09646
hsa-miR-6766-3p	6.8787	1.01929
hsa-miR-6766-5p	4.91336	1.01929
hsa-miR-6769a-3p	2.94802	3.05788
hsa-miR-6769b-3p	0.982672	3.05788
hsa-miR-6770-5p	4.91336	1.01929
hsa-miR-6772-3p	0.982672	3.05788
hsa-miR-6775-3p	2.94802	29.5595
hsa-miR-6777-3p	14.7401	3.05788
hsa-miR-6778-3p	0.982672	3.05788
hsa-miR-6779-3p	3.93069	2.03859
hsa-miR-6780a-5p	0.982672	2.03859
hsa-miR-6780b-3p	10.8094	7.13505
hsa-miR-6781-3p	0.982672	7.13505
hsa-miR-6782-3p	2.94802	1.01929
hsa-miR-6784-3p	3.93069	1.01929
hsa-miR-6784-5p	0.982672	3.05788
hsa-miR-6786-3p	5.89603	3.05788
hsa-miR-6787-3p	6.8787	15.2894
hsa-miR-6788-3p	2.94802	1.01929
hsa-miR-6788-5p	0.982672	3.05788
hsa-miR-6789-3p	0.982672	7.13505
hsa-miR-6791-3p	8.84405	11.2122
hsa-miR-6791-5p	22.6014	29.5595
hsa-miR-6793-3p	14.7401	17.328
hsa-miR-6795-3p	0.982672	2.03859
hsa-miR-6797-3p	20.6361	26.5016
hsa-miR-6797-5p	6.8787	1.01929
hsa-miR-6798-3p	6.8787	9.17363
hsa-miR-6799-3p	28.4975	39.7524
hsa-miR-6800-3p	0.982672	2.03859
hsa-miR-6801-3p	2.94802	4.07717
hsa-miR-6801-5p	4.91336	4.07717
hsa-miR-6802-3p	5.89603	7.13505
hsa-miR-6802-5p	1.96534	1.01929
hsa-miR-6803-3p	20.6361	23.4437
hsa-miR-6805-3p	4.91336	1.01929
hsa-miR-6806-3p	2.94802	1.01929
hsa-miR-6807-3p	16.7054	3.05788
hsa-miR-6807-5p	0.982672	3.05788
hsa-miR-6808-3p	0.982672	5.09646
hsa-miR-6809-3p	0.982672	3.05788
hsa-miR-6809-5p	0.982672	3.05788
hsa-miR-6810-3p	2.94802	1.01929
hsa-miR-6812-3p	2.94802	5.09646
hsa-miR-6815-5p	3.93069	1.01929
hsa-miR-6817-5p	2.94802	1.01929
hsa-miR-6818-3p	1.96534	3.05788
hsa-miR-6819-3p	10.8094	9.17363
hsa-miR-6820-3p	18.6708	5.09646
hsa-miR-6820-5p	3.93069	3.05788
hsa-miR-6822-3p	1.96534	1.01929
hsa-miR-6822-5p	19.6534	23.4437
hsa-miR-6823-3p	8.84405	5.09646
hsa-miR-6824-3p	4.91336	1.01929
hsa-miR-6825-3p	1.96534	2.03859
hsa-miR-6826-3p	54.0469	56.0611
hsa-miR-6826-5p	3.93069	7.13505
hsa-miR-6827-3p	10.8094	11.2122
hsa-miR-6827-5p	2.94802	12.2315
hsa-miR-6830-3p	0.982672	5.09646
hsa-miR-6830-5p	4.91336	1.01929
hsa-miR-6833-3p	2.94802	1.01929
hsa-miR-6833-5p	0.982672	3.05788
hsa-miR-6836-3p	0.982672	3.05788
hsa-miR-6837-5p	3.93069	4.07717
hsa-miR-6838-5p	3.93069	4.07717
hsa-miR-6840-3p	2.94802	1.01929
hsa-miR-6840-5p	5.89603	13.2508
hsa-miR-6842-3p	0.982672	17.328
hsa-miR-6845-3p	6.8787	3.05788
hsa-miR-6845-5p	2.94802	1.01929
hsa-miR-6849-3p	0.982672	2.03859
hsa-miR-6849-5p	2.94802	1.01929
hsa-miR-6850-3p	6.8787	24.463
hsa-miR-6851-3p	18.6708	9.17363
hsa-miR-6851-5p	3.93069	10.1929
hsa-miR-6852-3p	0.982672	2.03859
hsa-miR-6852-5p	35.3762	22.4244
hsa-miR-6853-3p	0.982672	3.05788
hsa-miR-6854-5p	6.8787	3.05788
hsa-miR-6855-3p	10.8094	4.07717
hsa-miR-6855-5p	0.982672	3.05788
hsa-miR-6858-3p	214.222	262.977
hsa-miR-6858-5p	2.94802	1.01929
hsa-miR-6859-3p	0.982672	7.13505
hsa-miR-6861-3p	5.89603	11.2122
hsa-miR-6861-5p	1.96534	1.01929
hsa-miR-6862-3p	2.94802	5.09646
hsa-miR-6862-5p	0.982672	3.05788
hsa-miR-6863	1.96534	1.01929
hsa-miR-6865-5p	0.982672	5.09646
hsa-miR-6866-3p	2.94802	5.09646
hsa-miR-6869-3p	0.982672	3.05788
hsa-miR-6870-3p	3.93069	1.01929
hsa-miR-6870-5p	3.93069	2.03859
hsa-miR-6873-3p	2.94802	3.05788
hsa-miR-6875-3p	3.93069	1.01929
hsa-miR-6876-5p	0.982672	3.05788
hsa-miR-6877-5p	0.982672	6.11576
hsa-miR-6880-3p	8.84405	9.17363
hsa-miR-6881-3p	5.89603	6.11576
hsa-miR-6881-5p	0.982672	2.03859
hsa-miR-6882-5p	0.982672	3.05788
hsa-miR-6883-3p	0.982672	6.11576
hsa-miR-6883-5p	0.982672	3.05788
hsa-miR-6884-3p	6.8787	3.05788
hsa-miR-6885-3p	4.91336	7.13505
hsa-miR-6886-3p	4.91336	2.03859
hsa-miR-6886-5p	2.94802	10.1929
hsa-miR-6889-3p	3.93069	11.2122
hsa-miR-6890-3p	2.94802	10.1929
hsa-miR-6891-3p	3.93069	2.03859
hsa-miR-6892-3p	4.91336	7.13505
hsa-miR-6892-5p	0.982672	3.05788
hsa-miR-6894-3p	8.84405	5.09646
hsa-miR-6894-5p	4.91336	1.01929
hsa-miR-6895-3p	1.96534	1.01929
hsa-miR-6895-5p	2.94802	1.01929
hsa-miR-708-3p	38.3242	32.6174
hsa-miR-708-5p	3473.74	2882.56
hsa-miR-7106-3p	4.91336	1.01929
hsa-miR-7106-5p	1.96534	2.03859
hsa-miR-7107-5p	0.982672	2.03859
hsa-miR-7108-3p	2.94802	5.09646
hsa-miR-7108-5p	0.982672	3.05788
hsa-miR-7109-3p	3.93069	1.01929
hsa-miR-7110-3p	6.8787	4.07717
hsa-miR-7111-3p	57.9776	39.7524
hsa-miR-7112-3p	3.93069	3.05788
hsa-miR-7113-3p	6.8787	1.01929
hsa-miR-7113-5p	0.982672	4.07717
hsa-miR-7114-3p	2.94802	9.17363
hsa-miR-7-1-3p	1354.12	1322.02
hsa-miR-7151-3p	2.94802	1.01929
hsa-miR-7152-5p	0.982672	2.03859
hsa-miR-7156-3p	2.94802	1.01929
hsa-miR-7162-3p	0.982672	3.05788
hsa-miR-7-2-3p	73.7004	42.8103
hsa-miR-744-3p	453.994	362.868
hsa-miR-744-5p	1512.33	1795.99
hsa-miR-758-3p	283.009	182.453
hsa-miR-758-5p	36.3589	33.6367
hsa-miR-7-5p	167.054	156.971
hsa-miR-760	14.7401	11.2122
hsa-miR-761	0.982672	3.05788
hsa-miR-7641	171.968	267.055
hsa-miR-765	1.96534	1.01929
hsa-miR-766-3p	542.435	534.109
hsa-miR-766-5p	7.86137	7.13505
hsa-miR-767-3p	2.94802	1.01929
hsa-miR-767-5p	0.982672	2.03859
hsa-miR-769-3p	132.661	141.682
hsa-miR-769-5p	305.611	291.518
hsa-miR-7702	0.982672	3.05788
hsa-miR-7704	8.84405	22.4244
hsa-miR-7705	1.96534	2.03859
hsa-miR-770-5p	147.401	157.99
hsa-miR-7706	14.7401	5.09646
hsa-miR-7843-5p	4.91336	1.01929
hsa-miR-7844-5p	1.96534	2.03859
hsa-miR-7846-3p	22.6014	1.01929
hsa-miR-7847-3p	2.94802	1.01929
hsa-miR-7851-3p	1.96534	7.13505
hsa-miR-7854-3p	0.982672	3.05788
hsa-miR-7855-5p	0.982672	2.03859
hsa-miR-7974	0.982672	3.05788
hsa-miR-7975	0.982672	3.05788
hsa-miR-7976	1.96534	1.01929
hsa-miR-7977	323.299	801.164
hsa-miR-8055	0.982672	4.07717
hsa-miR-8062	2.94802	1.01929
hsa-miR-8063	2.94802	1.01929
hsa-miR-8072	2.94802	1.01929
hsa-miR-8073	0.982672	2.03859
hsa-miR-8078	1.96534	1.01929
hsa-miR-8079	4.91336	4.07717
hsa-miR-8485	2.94802	20.3859
hsa-miR-874-3p	1522.16	1929.52
hsa-miR-874-5p	309.542	464.797
hsa-miR-877-3p	147.401	125.373
hsa-miR-877-5p	99.2498	92.7556
hsa-miR-885-5p	2.94802	5.09646
hsa-miR-887-3p	1117.3	1013.18
hsa-miR-887-5p	2.94802	3.05788
hsa-miR-889-3p	51.0989	72.3698
hsa-miR-889-5p	8.84405	3.05788
hsa-miR-891a-3p	0.982672	9.17363
hsa-miR-891a-5p	0.982672	3.05788
hsa-miR-891b	1.96534	1.01929
hsa-miR-892b	0.982672	2.03859
hsa-miR-921	2.94802	1.01929
hsa-miR-92a-1-5p	40.2895	37.7138
hsa-miR-92a-3p	19883.4	17372.8
hsa-miR-92b-3p	9440.53	9536.5
hsa-miR-92b-5p	59.943	87.6592
hsa-miR-933	5.89603	1.01929
hsa-miR-93-3p	698.68	606.479
hsa-miR-934	0.982672	3.05788
hsa-miR-935	2.94802	1.01929
hsa-miR-93-5p	28260.7	22741.4
hsa-miR-936	1.96534	1.01929
hsa-miR-937-3p	4.91336	8.15434
hsa-miR-937-5p	1.96534	3.05788
hsa-miR-938	10.8094	1.01929
hsa-miR-939-3p	8.84405	7.13505
hsa-miR-939-5p	7.86137	3.05788
hsa-miR-940	1467.13	2342.33
hsa-miR-941	4.91336	7.13505
hsa-miR-942-3p	11.7921	3.05788
hsa-miR-942-5p	30.4628	18.3473
hsa-miR-943	0.982672	3.05788
hsa-miR-95-3p	16.7054	9.17363
hsa-miR-9-5p	0.982672	3.05788
hsa-miR-96-3p	1.96534	3.05788
hsa-miR-96-5p	2.94802	13.2508
hsa-miR-98-3p	371.45	196.723
hsa-miR-98-5p	7602.93	6138.18
hsa-miR-99a-3p	567.984	613.614
hsa-miR-99a-5p	68973.7	62832.3
hsa-miR-99b-3p	1167.41	1489.19
hsa-miR-99b-5p	10126.4	12830.9
